# Supplementary material
Source: Royal Society of Chemistry journal article supplement (doi:10.1039/d6ay00396f)
Supplement: d6ay00396f1.pdf [file d6ay00396f1.pdf]

*Supplementary Material*

**Analytical Method Development for Multiresidue Determination in Water Using  
Automated Parallel Dispersive Pipette Extraction and HPLC-DAD**

João Pedro Ossucci Martins<sup>a</sup>, Augusto Bortolotto<sup>a</sup>, Francielle Crocetta Turazzi<sup>b</sup>, Lucas Morés<sup>a</sup>, Eduardo Carasek<sup>a\*</sup>

*<sup>a</sup>Departamento de Química, Universidade Federal de Santa Catarina, Florianópolis, 88040900, Brazil*

*<sup>b</sup>Departamento de Engenharia Mecânica, Universidade Federal de Santa Catarina, 88040900, Brazil*

\*To whom correspondence should be addressed: E-mail: [eduardo.carasek@ufsc.br](mailto:eduardo.carasek@ufsc.br)

**TABLES:**

**Table S1:** Structures and physicochemical properties of the studied analytes.

| Analytes                            | Chemical Structure                                                                  | log K <sub>ow</sub> | pKa   | Classification | Typical Uses                                  | Reference |
|-------------------------------------|-------------------------------------------------------------------------------------|---------------------|-------|----------------|-----------------------------------------------|-----------|
| Methylparaben (MP)                  | 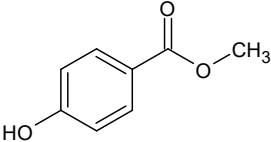   | 1.96                | 8.17  | Preservative   | Preservative in cosmetics and pharmaceuticals | 1         |
| Ethylparaben (EtP)                  |    | 2.47                | 8.22  | Preservative   | Preservative in personal care products        | 1         |
| Propylparaben (PrP)                 |    | 3.04                | 8.35  | Preservative   | Preservative in cosmetics                     | 1         |
| Butylparaben (BuP)                  |   | 3.57                | 8.37  | Preservative   | Preservative in industrial products           | 1         |
| Naproxen (NAP)                      |  | 3.18                | 4.15  | Pharmaceutical | NSAID used for pain and inflammation          | 2         |
| Indomethacin (IND)                  |  | 4.27                | 4.5   | Pharmaceutical | NSAID used for anti-inflammatory treatment    | 2         |
| 17 $\alpha$ -ethinylestradiol (EE2) |  | 4.12                | 10.46 | Hormone        | Synthetic hormone used in contraceptives      | 3         |
| Carbofuran (CF)                     |  | 1.76                | 10.09 | Pesticide      | Insecticide used in agriculture               | 4         |
| Diuron (DIU)                        |  | 2.68                | 13.55 | Pesticide      | Herbicide used for weed control               | 4         |

**Table S2:** Robustness table, conditions, variations and parameters.

| <b>Effect</b>             | <b>Nominal Condition</b> | <b>Variation (+)</b> | <b>Variation (-)</b> | <b>Parameter</b> |
|---------------------------|--------------------------|----------------------|----------------------|------------------|
| Extraction Cycles         | 9                        | 10                   | 8                    | a                |
| Desorption Cycles         | 3                        | 4                    | 2                    | b                |
| Sample Volume             | 1500 $\mu$ L             | 1525 $\mu$ L         | 1475 $\mu$ L         | c                |
| Desorption Solvent Volume | 200 $\mu$ L              | 210 $\mu$ L          | 190 $\mu$ L          | d                |
| pH                        | 8.0                      | 8.2                  | 7.8                  | e                |
| Flow                      | 1 mL/min                 | 1.1 mL/min           | 0.9 mL/min           | f                |
| Extractor Phase Mass      | 20 mg                    | 21 mg                | 19 mg                | g                |

**Table S3:** Robustness table experiments.

| <b>Exp</b> | <b>Ext</b> | <b>Des</b> | <b>Sample Vol</b> | <b>Desorption Vol</b> | <b>pH</b> | <b>Flow</b> | <b>Extractor Phase Mass</b> |
|------------|------------|------------|-------------------|-----------------------|-----------|-------------|-----------------------------|
| 1          | 10         | 4          | 1525              | 190                   | 8.2       | 0.9         | 19                          |
| 2          | 8          | 4          | 1525              | 210                   | 7.8       | 1.1         | 19                          |
| 3          | 8          | 2          | 1525              | 210                   | 8.2       | 0.9         | 21                          |
| 4          | 10         | 2          | 1475              | 210                   | 8.2       | 1.1         | 19                          |
| 5          | 8          | 4          | 1475              | 190                   | 8.2       | 1.1         | 21                          |
| 6          | 10         | 2          | 1525              | 190                   | 7.8       | 1.1         | 21                          |
| 7          | 10         | 4          | 1475              | 210                   | 7.8       | 0.9         | 21                          |
| 8          | 8          | 2          | 1475              | 190                   | 7.8       | 0.9         | 19                          |

## Statistical Test Data for the Selection of Desorption Solvent

*Table S4:* Desorption solvent selection statistics.

| ANOVA     |           |    |           |               |                 |                |
|-----------|-----------|----|-----------|---------------|-----------------|----------------|
| Model     | Effect SS | df | Effect MS | F             | p-value         | R <sup>2</sup> |
| Linear    | 1.22E+11  | 2  | 6.12E+10  | <b>268.69</b> | <b>&lt;1E-6</b> | <b>0.987</b>   |
| Quadratic | 1.16E+09  | 3  | 3.87E+08  | 3.57          | 0.125           | 0.996          |
| Total     | 1.24E+11  | 9  | 1.38E+10  |               |                 |                |

## Statistical Test Data for the Selection of Desorption Cycles

**Table S5:** Statistics for the selection of desorption cycles.

| <b>ANOVA</b> |           |    |           |              |              |                 |
|--------------|-----------|----|-----------|--------------|--------------|-----------------|
| Model        | Effect SS | df | Effect MS | F            | Critical F   | p-value         |
| Linear       | 3.23E+10  | 6  | 5.38E+09  | <b>8.836</b> | <b>2.848</b> | <b>4.18E-04</b> |
| Quadratic    | 8.52E+09  | 14 | 6.08E+08  |              |              |                 |
| Total        | 4.08E+10  | 20 |           |              |              |                 |

| <b>Comparison using Tukey's test</b> |                   |                |
|--------------------------------------|-------------------|----------------|
| Desorption cycles                    | Desorption cycles | p-value        |
| 1 Cycle                              | 2 Cycles          | <b>0.03806</b> |
|                                      | 3 Cycles          | <b>0.00026</b> |
|                                      | 4 Cycles          | <b>0.04031</b> |
|                                      | 5 Cycles          | <b>0.01487</b> |
|                                      | 6 Cycles          | <b>0.00056</b> |
|                                      | 7 Cycles          | 0.09532        |
|                                      | 3 Cycles          | 0.13653        |
| 2 Cycles                             | 4 Cycles          | 1.00000        |
|                                      | 5 Cycles          | 0.99810        |
|                                      | 6 Cycles          | 0.28147        |
|                                      | 7 Cycles          | 0.99802        |
| 3 Cycles                             | 4 Cycles          | 0.12952        |
|                                      | 5 Cycles          | 0.30262        |
|                                      | 6 Cycles          | 0.99893        |
| 4 Cycles                             | 7 Cycles          | 0.05578        |
|                                      | 5 Cycles          | 0.99735        |
|                                      | 6 Cycles          | 0.26878        |
| 5 Cycles                             | 7 Cycles          | 0.99861        |
|                                      | 6 Cycles          | 0.54146        |
| 6 Cycles                             | 7 Cycles          | 0.93561        |
| 6 Cycles                             | 7 Cycles          | 0.12472        |

| <b>Analysis of significant groups for desorption cycles using Tukey's test</b> |             |       |
|--------------------------------------------------------------------------------|-------------|-------|
| Desorption cycles                                                              | Mean        | Group |
| 3 Cycles                                                                       | 476900.7813 | A     |
| 6 Cycles                                                                       | 467496.5989 | A     |
| 5 Cycles                                                                       | 430311.6489 | A     |
| 2 Cycles                                                                       | 419880.6776 | A     |
| 4 Cycles                                                                       | 419237.7321 | A     |
| 7 Cycles                                                                       | 409375.1698 | A, B  |
| 1 Cycle                                                                        | 348042.3954 | B     |

### Statistical Test Data for the Selection of Cleaning Cycles

**Table S6:** Statistics for the selection of cleaning cycles using the geometric mean of chromatographic peak areas.

| ANOVA     |           |    |           |               |                 |                |
|-----------|-----------|----|-----------|---------------|-----------------|----------------|
| Model     | Effect SS | df | Effect MS | F             | Critical F      | p-value        |
| Linear    | 1.65E+06  | 3  | 5.49E+05  | <b>88.301</b> | <b>6.59E+00</b> | <b>0.00041</b> |
| Quadratic | 2.49E+04  | 4  | 6.22E+03  |               |                 |                |
| Total     | 1.67E+06  | 7  |           |               |                 |                |

| Comparison using Tukey's test |                 |                |
|-------------------------------|-----------------|----------------|
| Cleaning cycles               | Cleaning cycles | p-value        |
|                               | 2 Cycles        | 0.14534        |
| 1 Cycle                       | 3 Cycles        | <b>0.00079</b> |
|                               | 4 Cycles        | <b>0.00074</b> |
| 2 Cycles                      | 3 Cycles        | <b>0.00210</b> |
|                               | 4 Cycles        | <b>0.00196</b> |
| 3 Cycles                      | 4 Cycles        | 0.99746        |

| Analysis of significant groups for cleaning cycles using Tukey's test |            |       |
|-----------------------------------------------------------------------|------------|-------|
| Desorption cycles                                                     | Mean       | Group |
| 1 Cycle                                                               | 1013.71644 | A     |
| 2 Cycles                                                              | 790.38514  | A     |
| 3 Cycles                                                              | 15.4485    | B     |
| 4 Cycles                                                              | 1          | B     |

## Statistical Test Data for the Selection of pH

*Table S7:* Statistics for the selection of pH using the geometric mean of chromatographic peak areas.

| <b>ANOVA</b> |           |    |           |               |              |                 |
|--------------|-----------|----|-----------|---------------|--------------|-----------------|
| Model        | Effect SS | df | Effect MS | F             | Critical F   | p-value         |
| Linear       | 2.46E+10  | 4  | 6.15E+09  | <b>12.877</b> | <b>3.478</b> | <b>5.89E-04</b> |
| Quadratic    | 4.78E+09  | 10 | 4.78E+08  |               |              |                 |
| Total        | 2.94E+10  | 14 |           |               |              |                 |

| <b>Comparison using Tukey's test</b> |       |                |
|--------------------------------------|-------|----------------|
| pH                                   | pH    | p-value        |
|                                      | pH 4  | <b>0.00919</b> |
| pH 2                                 | pH 6  | <b>0.00161</b> |
|                                      | pH 8  | <b>0.00044</b> |
|                                      | pH 10 | <b>0.02921</b> |
|                                      | pH 6  | 0.73954        |
| pH 4                                 | pH 8  | 0.24593        |
|                                      | pH 10 | 0.93709        |
|                                      | pH 8  | 0.84871        |
| pH 6                                 | pH 10 | 0.33995        |
|                                      | pH 10 | 0.08055        |

| <b>Analysis of significant groups for pH using Tukey's test</b> |             |       |
|-----------------------------------------------------------------|-------------|-------|
| pH                                                              | Mean        | Group |
| pH 8                                                            | 480893.829  | A     |
| pH 6                                                            | 463012.0021 | A     |
| pH 4                                                            | 441191.9738 | A     |
| pH 10                                                           | 427670.7078 | A     |
| pH 2                                                            | 362766.1927 | B     |

**Table S8:** Statistics for the selection of pH for 17 $\alpha$ -ethinylestradiol.

| ANOVA     |           |    |           |              |              |                 |
|-----------|-----------|----|-----------|--------------|--------------|-----------------|
| Model     | Effect SS | df | Effect MS | F            | Critical F   | p-value         |
| Linear    | 1.72E+08  | 4  | 4.30E+07  | <b>11.66</b> | <b>3.478</b> | <b>8.78E-04</b> |
| Quadratic | 3.69E+07  | 10 | 3.69E+06  |              |              |                 |
| Total     | 2.94E+10  | 14 |           |              |              |                 |

| Comparison using Tukey's test |       |                |
|-------------------------------|-------|----------------|
| pH                            | pH    | p-value        |
|                               | pH 4  | <b>0.00062</b> |
| pH 2                          | pH 6  | 0.09406        |
|                               | pH 8  | <b>0.0226</b>  |
|                               | pH 10 | 0.6293         |
|                               | pH 6  | <b>0.03794</b> |
| pH 4                          | pH 8  | 0.15539        |
|                               | pH 10 | <b>0.0042</b>  |
|                               | pH 8  | 0.88207        |
| pH 6                          | pH 10 | 0.60691        |
|                               | pH 10 | 0.19719        |

| Analysis of significant groups for pH using Tukey's test |             |       |
|----------------------------------------------------------|-------------|-------|
| pH                                                       | Mean        | Group |
| pH 4                                                     | 48497.33333 | A     |
| pH 8                                                     | 44505       | A, B  |
| pH 6                                                     | 43059.66667 | B, C  |
| pH 10                                                    | 40770.33333 | B, C  |
| pH 2                                                     | 38543       | C     |

**Table S9:** Statistics for the selection of pH for carbofuran.

| <b>ANOVA</b> |           |    |           |              |              |               |
|--------------|-----------|----|-----------|--------------|--------------|---------------|
| Model        | Effect SS | df | Effect MS | F            | Critical F   | p-value       |
| Linear       | 3.39E+08  | 4  | 8.47E+07  | <b>5.319</b> | <b>3.478</b> | <b>0.0147</b> |
| Quadratic    | 1.59E+08  | 10 | 1.59E+07  |              |              |               |
| Total        | 4.98E+08  | 14 |           |              |              |               |

| <b>Comparison using Tukey's test</b> |       |               |
|--------------------------------------|-------|---------------|
| pH                                   | pH    | p-value       |
| pH 2                                 | pH 4  | <b>0.0198</b> |
|                                      | pH 6  | 0.1227        |
|                                      | pH 8  | <b>0.0351</b> |
|                                      | pH 10 | 0.7437        |
| pH 4                                 | pH 6  | 0.7601        |
|                                      | pH 8  | 0.9953        |
|                                      | pH 10 | 0.1285        |
| pH 6                                 | pH 8  | 0.9208        |
|                                      | pH 10 | 0.5898        |
| pH 8                                 | pH 10 | 0.2205        |

**Analysis of significant groups for pH using Tukey's test**

| pH    | Mean        | Group |
|-------|-------------|-------|
| pH 4  | 87580       | A     |
| pH 8  | 86369.66667 | A     |
| pH 6  | 83720.66667 | A, B  |
| pH 10 | 78862.33333 | A, B  |
| pH 2  | 74902.66667 | B     |

**Table S10:** Statistics for the selection of pH for methylparaben.

| <b>ANOVA</b> |           |    |           |              |              |                |
|--------------|-----------|----|-----------|--------------|--------------|----------------|
| Model        | Effect SS | df | Effect MS | F            | Critical F   | p-value        |
| Linear       | 3.37E+10  | 4  | 8.42E+09  | <b>2.422</b> | <b>3.478</b> | <b>0.11695</b> |
| Quadratic    | 3.48E+10  | 10 | 3.48E+09  |              |              |                |
| Total        | 6.84E+10  | 14 |           |              |              |                |

| <b>Comparison using Tukey's test</b> |       |         |
|--------------------------------------|-------|---------|
| pH                                   | pH    | p-value |
| pH 2                                 | pH 4  | 0.2336  |
|                                      | pH 6  | 0.3114  |
|                                      | pH 8  | 0.1953  |
|                                      | pH 10 | 0.9818  |
| pH 4                                 | pH 6  | 0.9995  |
|                                      | pH 8  | 0.9999  |
|                                      | pH 10 | 0.4594  |
| pH 6                                 | pH 8  | 0.9966  |
|                                      | pH 10 | 0.5754  |
| pH 8                                 | pH 10 | 0.3962  |

| <b>Analysis of significant groups for pH using Tukey's test</b> |              |       |
|-----------------------------------------------------------------|--------------|-------|
| pH                                                              | Mean         | Group |
| pH 8                                                            | 904402.33333 | A     |
| pH 4                                                            | 898296.66667 | A     |
| pH 6                                                            | 888017       | A     |
| pH 10                                                           | 815028.66667 | A     |
| pH 2                                                            | 789409       | A     |

**Table S11:** Statistics for the selection of pH for ethylparaben.

| <b>ANOVA</b> |           |    |           |              |              |                |
|--------------|-----------|----|-----------|--------------|--------------|----------------|
| Model        | Effect SS | df | Effect MS | F            | Critical F   | p-value        |
| Linear       | 3.20E+10  | 4  | 8.00E+09  | <b>3.346</b> | <b>3.478</b> | <b>0.05523</b> |
| Quadratic    | 2.39E+10  | 10 | 2.39E+09  |              |              |                |
| Total        | 5.59E+10  | 14 |           |              |              |                |

| <b>Comparison using Tukey's test</b> |       |         |
|--------------------------------------|-------|---------|
| pH                                   | pH    | p-value |
| pH 2                                 | pH 4  | 0.1004  |
|                                      | pH 6  | 0.238   |
|                                      | pH 8  | 0.1012  |
|                                      | pH 10 | 0.9423  |
| pH 4                                 | pH 6  | 0.9735  |
|                                      | pH 8  | 1       |
|                                      | pH 10 | 0.291   |
| pH 6                                 | pH 8  | 0.9743  |
|                                      | pH 10 | 0.5789  |
| pH 8                                 | pH 10 | 0.293   |

| <b>Analysis of significant groups for pH using Tukey's test</b> |              |       |
|-----------------------------------------------------------------|--------------|-------|
| pH                                                              | Mean         | Group |
| pH 4                                                            | 847800.66667 | A     |
| pH 8                                                            | 847597.33333 | A     |
| pH 6                                                            | 824237       | A     |
| pH 10                                                           | 763932.33333 | A     |
| pH 2                                                            | 734445.33333 | A     |

**Table S12:** Statistics for the selection of pH for propylparaben.

| <b>ANOVA</b> |           |    |           |              |              |                |
|--------------|-----------|----|-----------|--------------|--------------|----------------|
| Model        | Effect SS | df | Effect MS | F            | Critical F   | p-value        |
| Linear       | 3.85E+10  | 4  | 9.63E+09  | <b>5.236</b> | <b>3.478</b> | <b>0.01545</b> |
| Quadratic    | 1.84E+10  | 10 | 1.84E+09  |              |              |                |
| Total        | 5.69E+10  | 14 |           |              |              |                |

| <b>Comparison using Tukey's test</b> |       |               |
|--------------------------------------|-------|---------------|
| pH                                   | pH    | p-value       |
| pH 2                                 | pH 4  | <b>0.0196</b> |
|                                      | pH 6  | 0.1567        |
|                                      | pH 8  | <b>0.0381</b> |
|                                      | pH 10 | 0.7622        |
| pH 4                                 | pH 6  | 0.6669        |
|                                      | pH 8  | 0.9918        |
|                                      | pH 10 | 0.1209        |
| pH 6                                 | pH 8  | 0.881         |
|                                      | pH 10 | 0.6631        |
| pH 8                                 | pH 10 | 0.2261        |

**Analysis of significant groups for pH using Tukey's test**

| pH    | Mean         | Group |
|-------|--------------|-------|
| pH 4  | 872066.66667 | A     |
| pH 8  | 857019.66667 | A     |
| pH 6  | 824639.33333 | A, B  |
| pH 10 | 776978.33333 | A, B  |
| pH 2  | 735649       | B     |

**Table S13:** Statistics for the selection of pH for butylparaben.

| <b>ANOVA</b> |           |    |           |              |              |                |
|--------------|-----------|----|-----------|--------------|--------------|----------------|
| Model        | Effect SS | df | Effect MS | F            | Critical F   | p-value        |
| Linear       | 2.39E+10  | 4  | 5.98E+09  | <b>7.133</b> | <b>3.478</b> | <b>0.00554</b> |
| Quadratic    | 8.38E+09  | 10 | 8.38E+08  |              |              |                |
| Total        | 3.23E+10  | 14 |           |              |              |                |

| <b>Comparison using Tukey's test</b> |       |               |
|--------------------------------------|-------|---------------|
| pH                                   | pH    | p-value       |
| pH 2                                 | pH 4  | <b>0.0051</b> |
|                                      | pH 6  | 0.1562        |
|                                      | pH 8  | <b>0.0214</b> |
|                                      | pH 10 | 0.5745        |
| pH 4                                 | pH 6  | 0.237         |
|                                      | pH 8  | 0.8679        |
|                                      | pH 10 | 0.0511        |
| pH 6                                 | pH 8  | 0.7003        |
|                                      | pH 10 | 0.8383        |
| pH 8                                 | pH 10 | 0.2154        |

**Analysis of significant groups for pH using Tukey's test**

| pH    | Mean         | Group |
|-------|--------------|-------|
| pH 4  | 643132.33333 | A     |
| pH 8  | 620503.66667 | A     |
| pH 6  | 589898       | A, B  |
| pH 10 | 565655.33333 | A, B  |
| pH 2  | 529771.66667 | B     |

**Table S14:** Statistics for the selection of pH for diuron.

| <b>ANOVA</b> |           |    |           |              |              |                |
|--------------|-----------|----|-----------|--------------|--------------|----------------|
| Model        | Effect SS | df | Effect MS | F            | Critical F   | p-value        |
| Linear       | 1.14E+10  | 4  | 2.85E+09  | <b>6.196</b> | <b>3.478</b> | <b>0.00896</b> |
| Quadratic    | 4.60E+09  | 10 | 4.60E+08  |              |              |                |
| Total        | 1.60E+10  | 14 |           |              |              |                |

| <b>Comparison using Tukey's test</b> |       |               |
|--------------------------------------|-------|---------------|
| pH                                   | pH    | p-value       |
| pH 2                                 | pH 4  | <b>0.0083</b> |
|                                      | pH 6  | 0.12          |
|                                      | pH 8  | <b>0.0213</b> |
|                                      | pH 10 | 0.4091        |
| pH 4                                 | pH 6  | 0.4506        |
|                                      | pH 8  | 0.9674        |
|                                      | pH 10 | 0.1359        |
| pH 6                                 | pH 8  | 0.7925        |
|                                      | pH 10 | 0.8941        |
| pH 8                                 | pH 10 | 0.3268        |

**Analysis of significant groups for pH using Tukey's test**

| pH    | Mean         | Group |
|-------|--------------|-------|
| pH 4  | 476120.66667 | A     |
| pH 8  | 465153       | A     |
| pH 6  | 445513.33333 | A, B  |
| pH 10 | 429912.66667 | A, B  |
| pH 2  | 397852       | B     |

**Table S15:** Statistics for the selection of pH for indomethacin.

| <b>ANOVA</b> |           |    |           |              |              |                   |
|--------------|-----------|----|-----------|--------------|--------------|-------------------|
| Model        | Effect SS | df | Effect MS | F            | Critical F   | p-value           |
| Linear       | 2.05E+11  | 4  | 5.14E+10  | <b>80.68</b> | <b>3.478</b> | <b>&lt;0.0001</b> |
| Quadratic    | 6.37E+09  | 10 | 6.37E+08  |              |              |                   |
| Total        | 2.12E+11  | 14 |           |              |              |                   |

| <b>Comparison using Tukey's test</b> |       |                   |
|--------------------------------------|-------|-------------------|
| pH                                   | pH    | p-value           |
| pH 2                                 | pH 4  | <b>0.0355</b>     |
|                                      | pH 6  | <b>&lt;0.0001</b> |
|                                      | pH 8  | <b>&lt;0.0001</b> |
|                                      | pH 10 | <b>&lt;0.0001</b> |
| pH 4                                 | pH 6  | <b>&lt;0.0001</b> |
|                                      | pH 8  | <b>&lt;0.0001</b> |
|                                      | pH 10 | <b>0.0007</b>     |
| pH 6                                 | pH 8  | 0.5806            |
|                                      | pH 10 | <b>0.0311</b>     |
| pH 8                                 | pH 10 | <b>0.0033</b>     |

**Analysis of significant groups for pH using Tukey's test**

| pH    | Mean         | Group |
|-------|--------------|-------|
| pH 8  | 472144.33333 | A     |
| pH 6  | 441093.66667 | A     |
| pH 10 | 366969       | B     |
| pH 4  | 239237       | C     |
| pH 2  | 166886       | D     |

**Table S16:** Statistics for the selection of pH for naproxen.

| ANOVA     |           |    |           |              |              |                   |
|-----------|-----------|----|-----------|--------------|--------------|-------------------|
| Model     | Effect SS | df | Effect MS | F            | Critical F   | p-value           |
| Linear    | 4.41E12   | 4  | 1.10E12   | <b>24.32</b> | <b>3.478</b> | <b>&lt;0.0001</b> |
| Quadratic | 4.53E11   | 10 | 4.53E10   |              |              |                   |
| Total     | 4.86E12   | 14 |           |              |              |                   |

| Comparison using Tukey's test |       |                   |
|-------------------------------|-------|-------------------|
| pH                            | pH    | p-value           |
|                               | pH 4  | 0.05399           |
| pH 2                          | pH 6  | <b>0.00011</b>    |
|                               | pH 8  | <b>&lt;0.0001</b> |
|                               | pH 10 | <b>0.00215</b>    |
|                               | pH 6  | <b>0.00695</b>    |
| pH 4                          | pH 8  | <b>0.00256</b>    |
|                               | pH 10 | 0.26749           |
|                               | pH 8  | 0.9526            |
| pH 6                          | pH 10 | 0.18688           |
|                               | pH 10 | 0.0655            |

| Analysis of significant groups for pH using Tukey's test |               |       |
|----------------------------------------------------------|---------------|-------|
| pH                                                       | Mean          | Group |
| pH 8                                                     | 4000316.33333 | A     |
| pH 6                                                     | 3879205.33333 | A     |
| pH 10                                                    | 3458619.33333 | A, B  |
| pH 4                                                     | 3082646.66667 | B, C  |
| pH 2                                                     | 2519261.33333 | C     |

## Statistical Test Data for the Selection of Extraction Cycles and Salt

**Table S17:** Statistics for the selection of extraction cycles and salt.

| ANOVA                      |          |    |        |         |                |
|----------------------------|----------|----|--------|---------|----------------|
| Factor                     | SS       | df | F      | p-value | R <sup>2</sup> |
| Extraction Cycles (L)      | 8.42E+10 | 1  | 41.11  | 0.0985  |                |
| Extraction Cycles (Q)      | 8.30E+09 | 1  | 4.05   | 0.2934  |                |
| Salt Percentage (L)        | 2.17E+11 | 1  | 105.86 | 0.0617  |                |
| Salt Percentage (Q)        | 4.04E+10 | 1  | 19.72  | 0.1410  |                |
| Interaction of Factors (L) | 3.11E+10 | 1  | 15.21  | 0.1598  |                |
| Error                      | 2.05E+09 | 1  |        |         |                |
| Total                      | 3.75E+11 | 6  |        |         | 0.9945         |

**Table S18:** Experimental enrichment factor for each analyte.

| <b>Analytes</b> | <b>Experimental Enrichment Factor</b> |
|-----------------|---------------------------------------|
| MP              | 31.46                                 |
| EtP             | 34.50                                 |
| PrP             | 36.90                                 |
| BuP             | 34.68                                 |
| NAP             | 32.17                                 |
| IND             | 28.54                                 |
| EE2             | 27.56                                 |
| CF              | 43.38                                 |
| DIU             | 40.40                                 |
| <b>Average</b>  | <b>34.05</b>                          |

$$EF(\text{theoretical}) = \frac{V_{\text{sample}}}{V_{\text{solvent}}} = \frac{13.5}{0.2} = 67.5$$

$$EF(\text{experimental}) = \frac{A_{\text{extract}}}{A_{\text{solution}}}$$

**Table S19:** Criteria and scores' values obtained to AGREE and AGREEprep metrics of the proposed method.

---

**AGREE criteria**

---

1. Direct analytical techniques should be applied to avoid sample treatment – Weight 2 = External sample pre- and treatment and batch analysis (reduced number of steps)
  2. Minimal sample size and minimal number of samples are goals – Weight 2 = 13.5 mL
  3. If possible, measurements should be performed in situ – Weight 2 = Off-line
  4. Integration of analytical processes and operations saves energy and reduces the use of reagents – Weight 2 = 3
  5. Automated and miniaturized methods should be selected – Weight 2 = Automatic and miniaturized
  6. Derivatization should be avoided – Weight 2 = None
  7. Generation of a large volume of analytical waste should be avoided, and proper management of analytical waste should be provided – Weight 2 = 16.5 mL
  8. Multi-analyte or multi-parameter methods are preferred versus methods using one analyte at a time – Weight 2 = 9 analytes and 3 samples/h
  9. The use of energy should be minimized – Weight 2 = 0.15 kWh
  10. Reagents obtained from renewable sources should be preferred – Weight 2 = None of the reagents are from bio-based sources
  11. Toxic reagents should be eliminated or replaced – Weight 2 = 2.5 mL
  12. Operator's safety should be increased – Weight 2 = Toxic to aquatic life, bioaccumulative, persistent
-

---

**AGREE score**

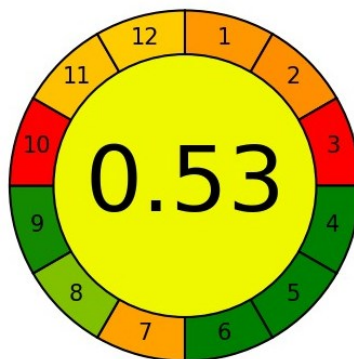

---

**AGREEprep criteria**

- 
1. Sample preparation placement – Weight 1 = Ex situ
  2. Hazardous materials – Weight 5 = 2.5 mL
  3. Sustainability, renewability, and reusability of materials – Weight 2 = Materials are not sustainable or renewable, but are used SEVERAL TIMES
  4. Waste – Weight 4 = 16.5 mL
  5. Size economy of the sample – Weight 2 = 13.5 mL
  6. Sample throughput – Weight 3 = 14.45 samples/h
  7. Integration and automation – Weight 2 = 3 steps and fully automated systems
  8. Energy consumption – Weight 4 = 1.5 W
  9. Post-sample preparation configuration for analysis – Weight 2 = HPLC with non-MS detection
  10. Operator's safety – Weight 3 = 2 hazard
-

---

AGREEprep score

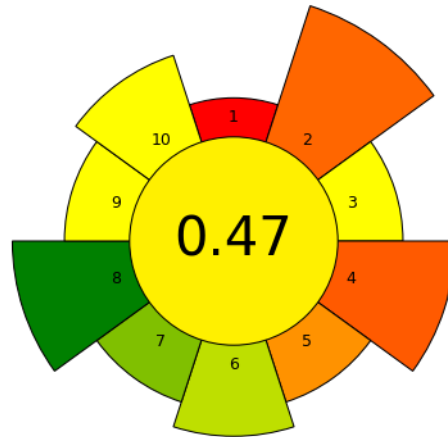

## FIGURES:

**Figure S1:** Localization of the coordinates that the samples were collected (Florianópolis – SC).

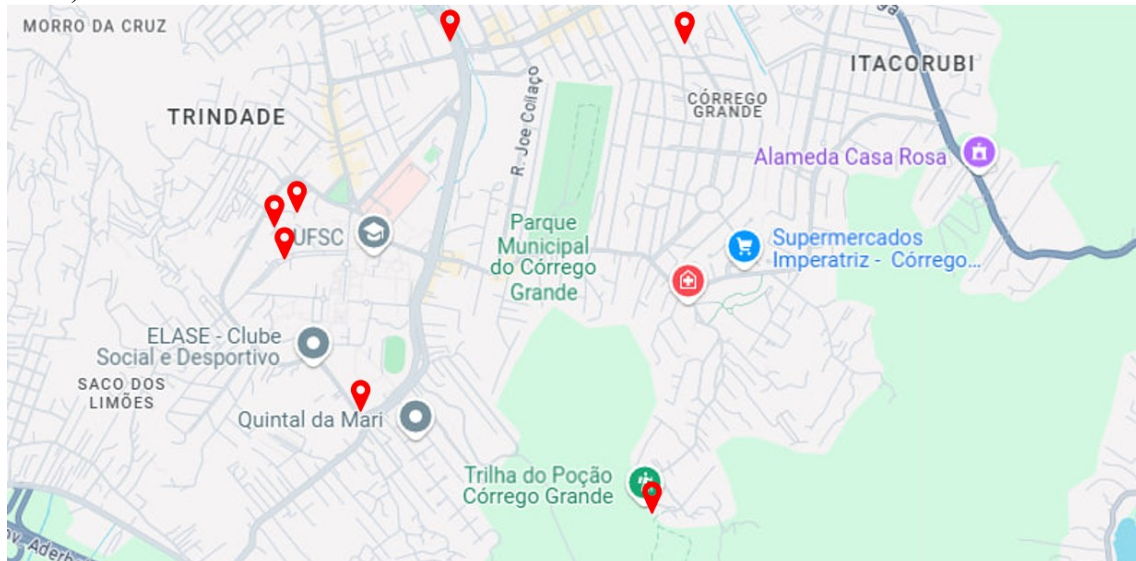

## Statistical Test Data for the Selection of Desorption Solvent

**Figure S2:** Residuals plot of observed vs. predicted for the quadratic model.

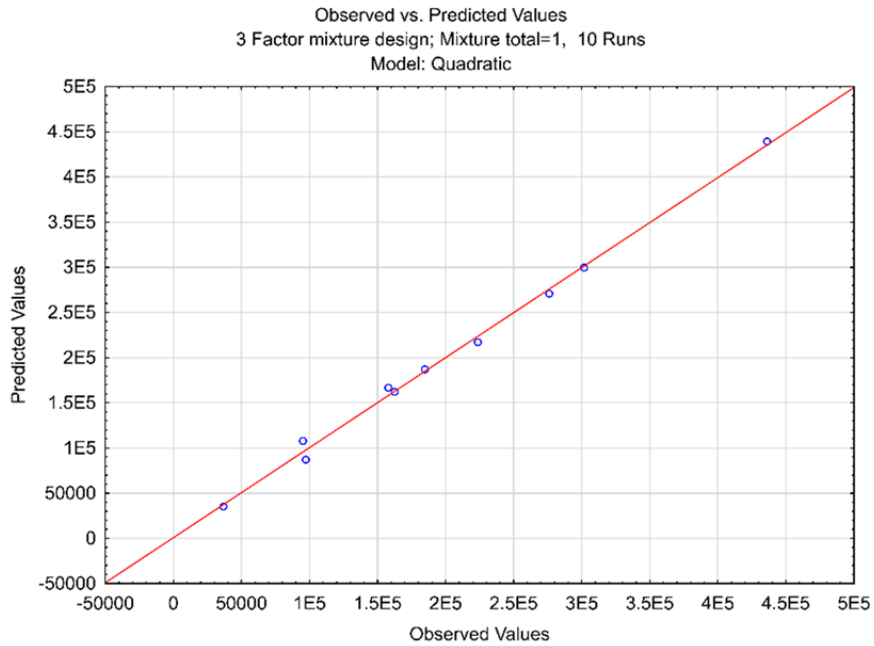

**Figure S3:** Pareto chart for the quadratic model of desorption solvent.

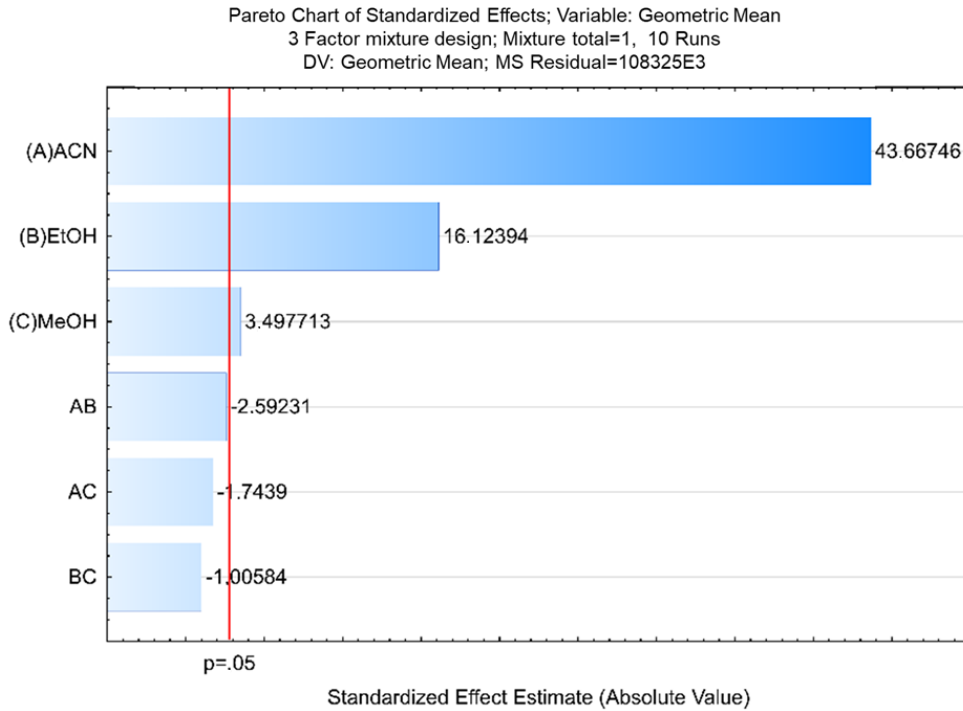

**Figure S4:** Optimization of pH based on the mean normalized peak areas of each analyte. Fixed Conditions: Conditioning: 2 cycles with 500  $\mu\text{L}$  of MeOH:ACN (1:1 v/v) and 1 cycle with 500  $\mu\text{L}$  of UPW. Extraction: 7 cycles with 1.5 mL of UPW, spiked with 300  $\mu\text{g L}^{-1}$  of the analytes. Desorption: 3 cycles with 200  $\mu\text{L}$  of ACN. Evaluated pH levels: 2, 4, 6, 8 and 10. No salt added.

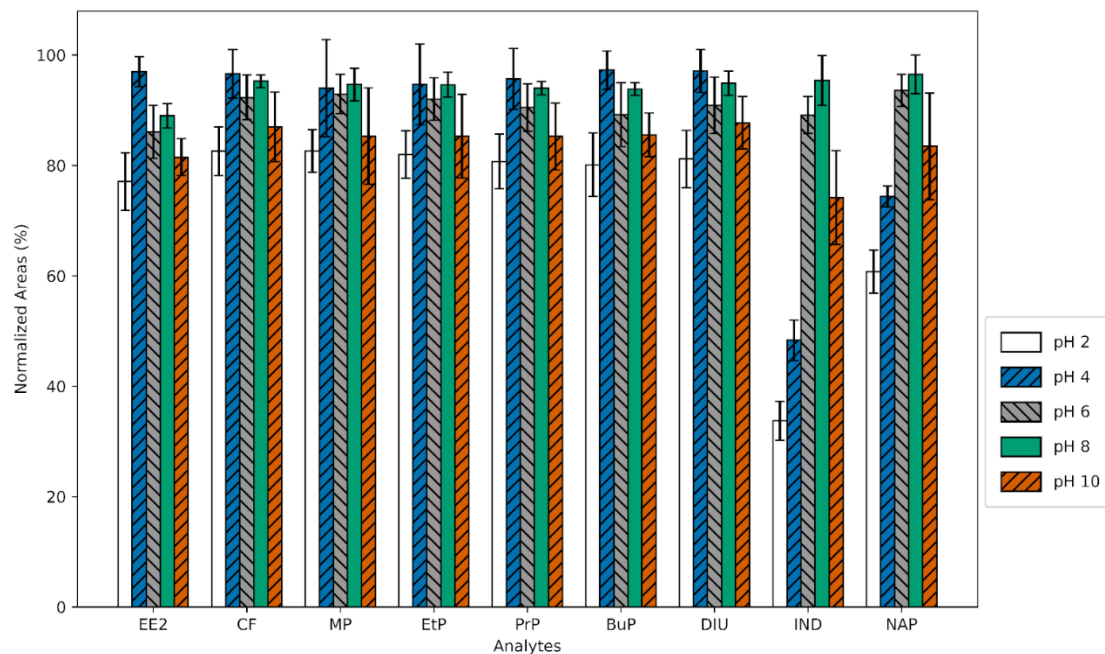

## Statistical Test Data for the Selection of Extraction Cycles and Salting-out Effect

**Figure S5:** Residuals plot of observed vs. predicted for the quadratic model for extraction cycles and salting-out effect.

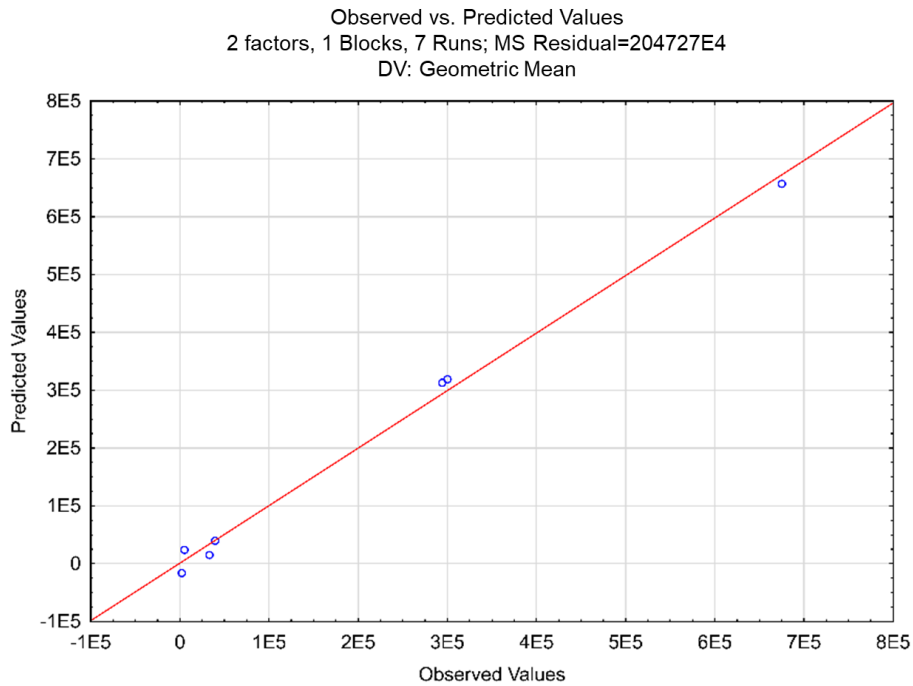

**Figure S6:** Pareto chart for the quadratic model for extraction cycles and salting-out effect.

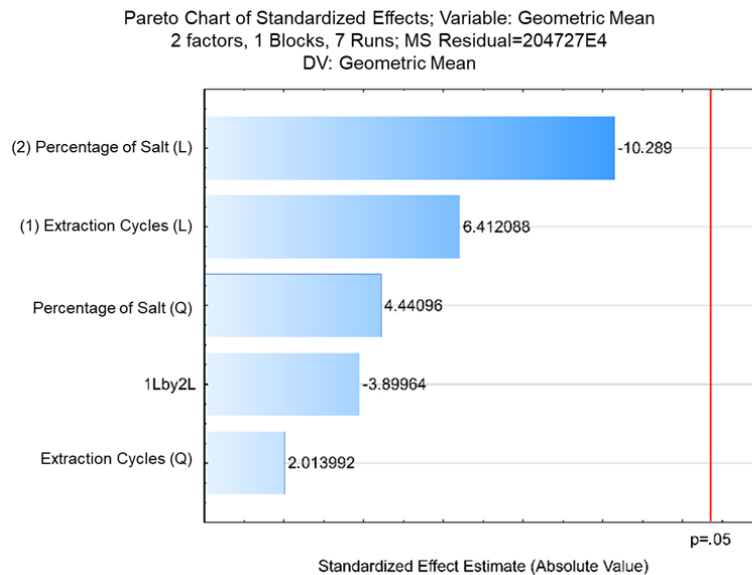

**Figure S7:** Robustness graph. Comparison of effects on response variables. Positive effects are shown in blue, and negative effects in red.

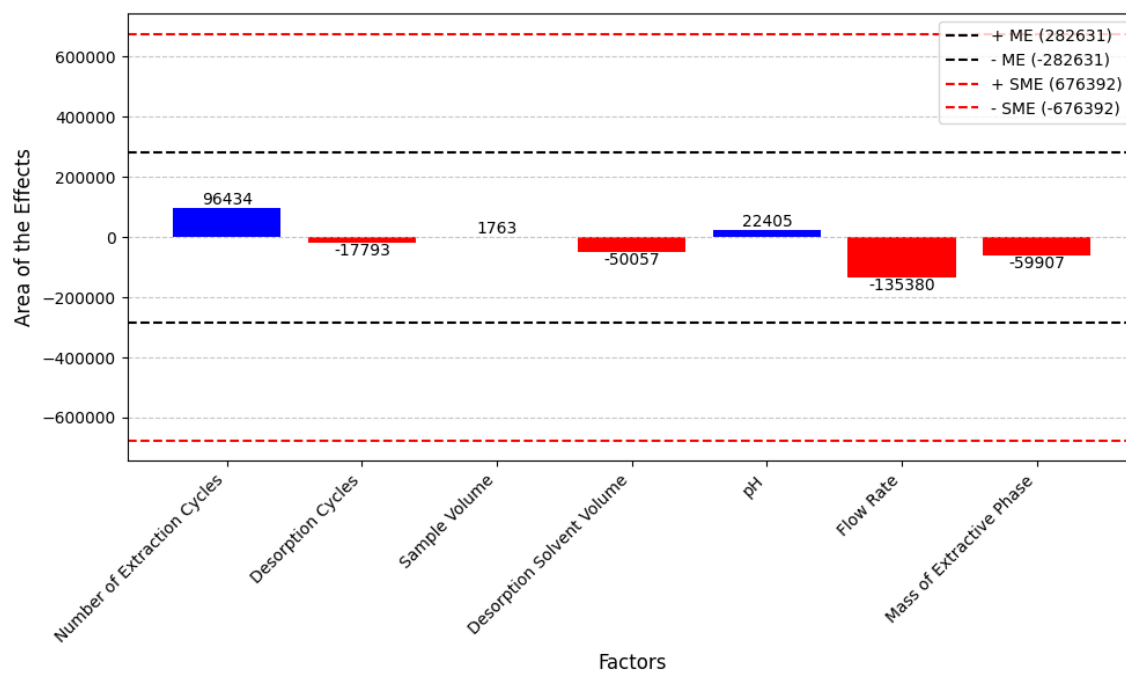

For the following figures, analytes are: 1- Methylparaben (MP), 2- Ethylparaben (EtP), 3- Carbofuran (CF), 4- Propylparaben (PrP), 5- Diuron (DIU), 6- Naproxen (NAP), 7- 17 $\alpha$ -Ethinylestradiol (EE2), 8- Butylparaben (BuP) and 9- Indomethacin (IND).

**Figure S8:** Chromatograms obtained at 280 nm for both the blank sample (black, sample 1) and the spiked sample (red, fortified at 10  $\mu\text{g L}^{-1}$ ), both subjected to the optimized extraction method.

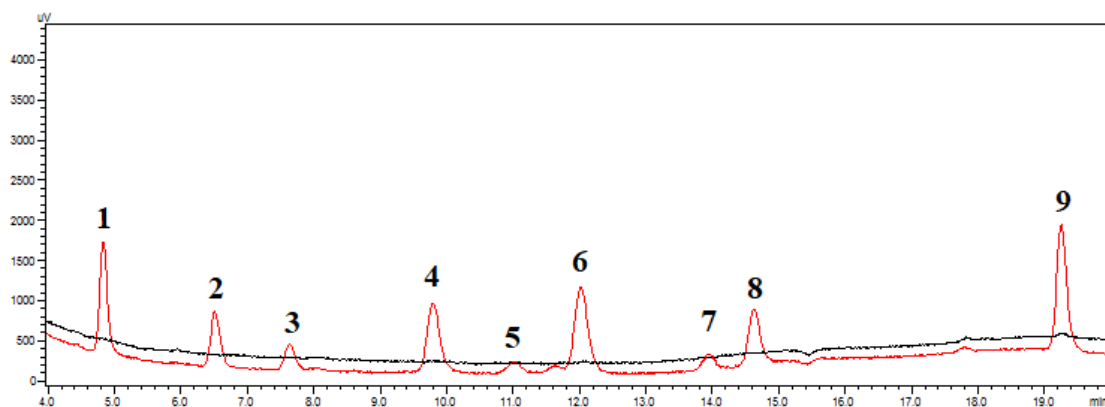

**Figure S9:** Chromatograms obtained at 280 nm for both the blank sample (black, sample 2) and the spiked sample (red, fortified at 10  $\mu\text{g L}^{-1}$ ), both subjected to the optimized extraction method.

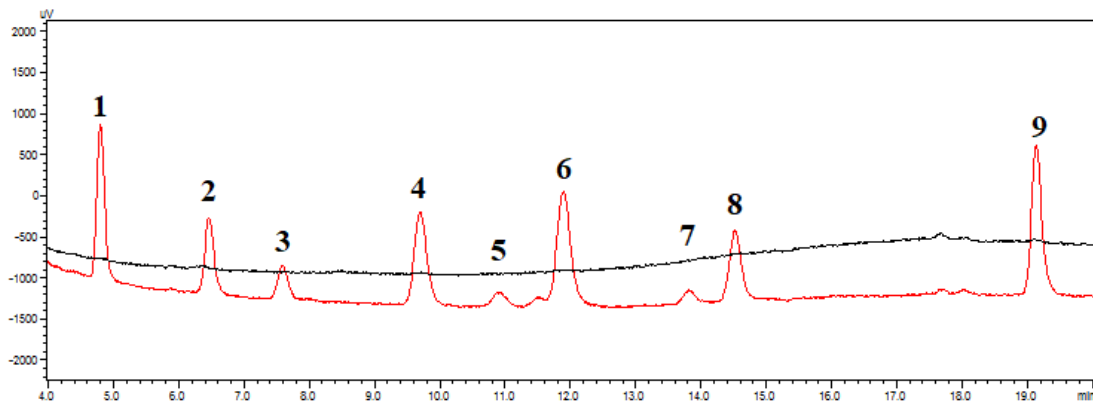

**Figure S10:**

**A-** Chromatograms obtained at 250 nm for both the blank sample (black, sample 3) and the spiked sample (red, fortified at  $10 \mu\text{g L}^{-1}$ ), both subjected to the optimized extraction method.

**B-** Chromatograms obtained at 275 nm for both the blank sample (black, sample 3) and the spiked sample (red, fortified at  $10 \mu\text{g L}^{-1}$ ), both subjected to the optimized extraction method.

**C-** Chromatograms obtained at 280 nm for both the blank sample (black, sample 3) and the spiked sample (red, fortified at  $10 \mu\text{g L}^{-1}$ ), both subjected to the optimized extraction method.

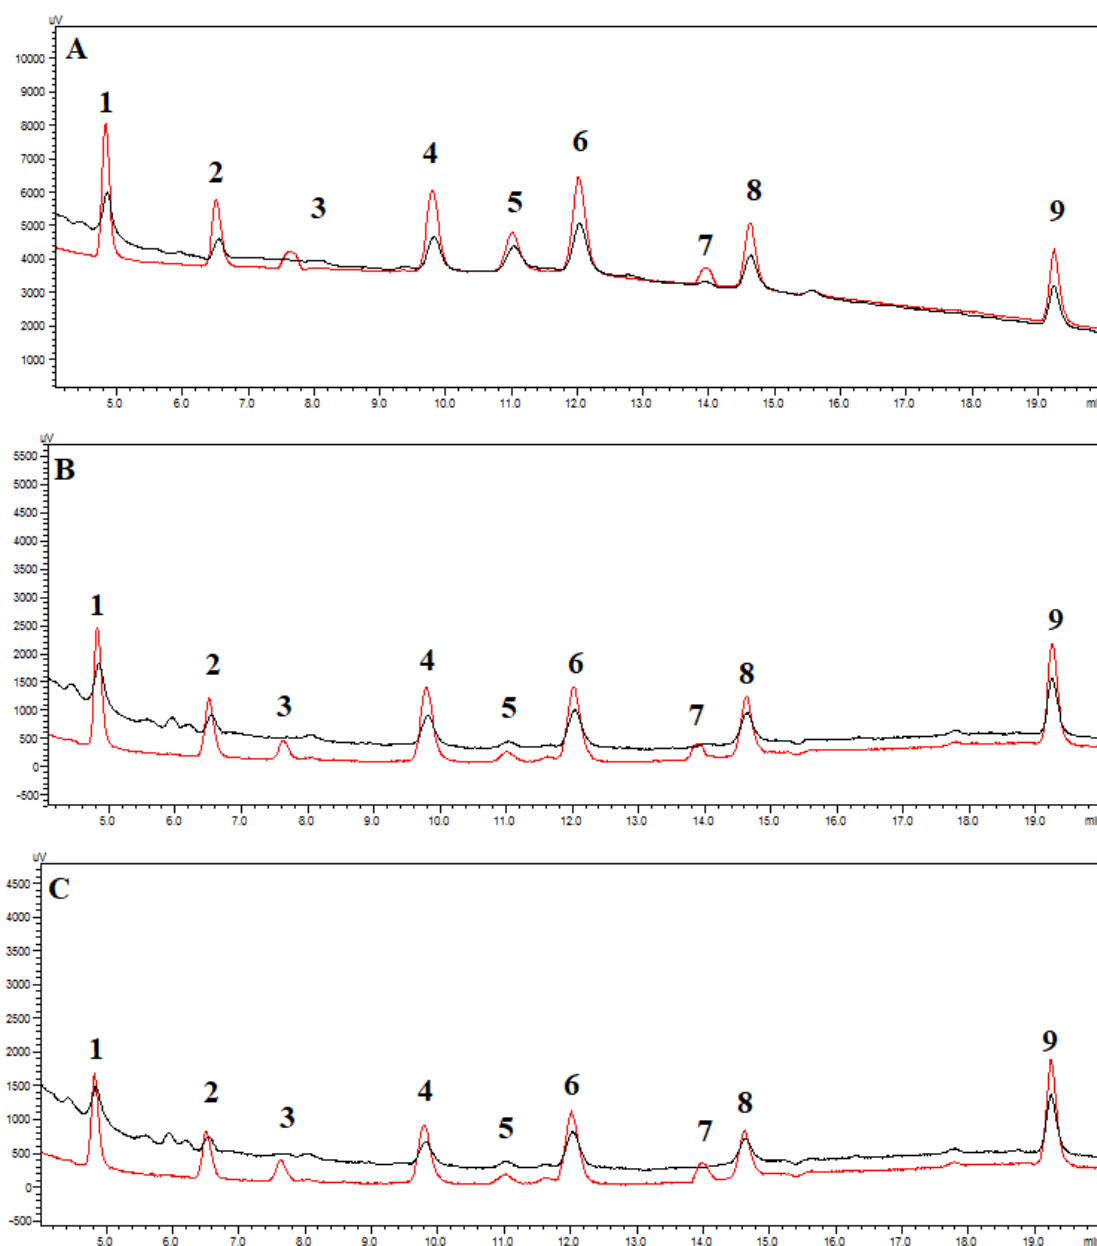

**Figure S11:** Chromatograms obtained at 280 nm for both the blank sample (black, sample 4) and the spiked sample (red, fortified at  $10 \mu\text{g L}^{-1}$ ), both subjected to the optimized extraction method.

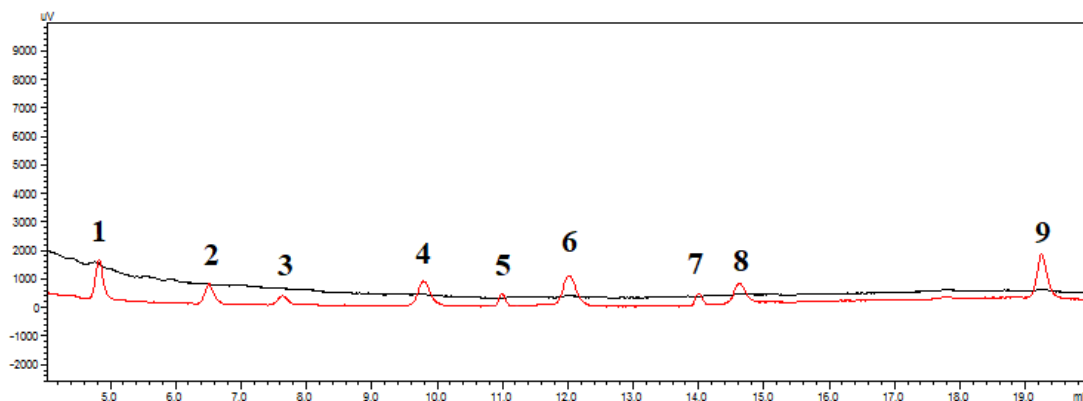

**Figure S12:** Chromatograms obtained at 280 nm for both the blank sample (black, sample 5) and the spiked sample (red, fortified at  $10 \mu\text{g L}^{-1}$ ), both subjected to the optimized extraction method.

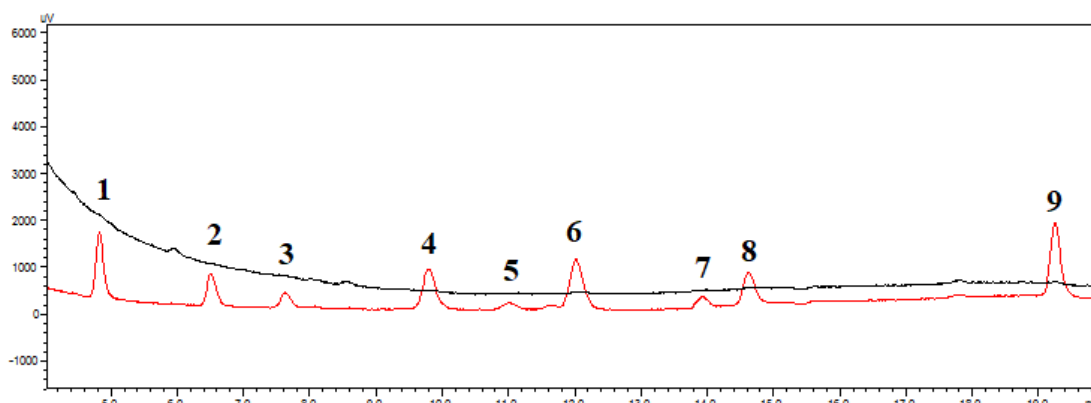

**Figure S13:** Chromatograms obtained at 280 nm for both the blank sample (black, sample 6) and the spiked sample (red, fortified at  $10 \mu\text{g L}^{-1}$ ), both subjected to the optimized extraction method.

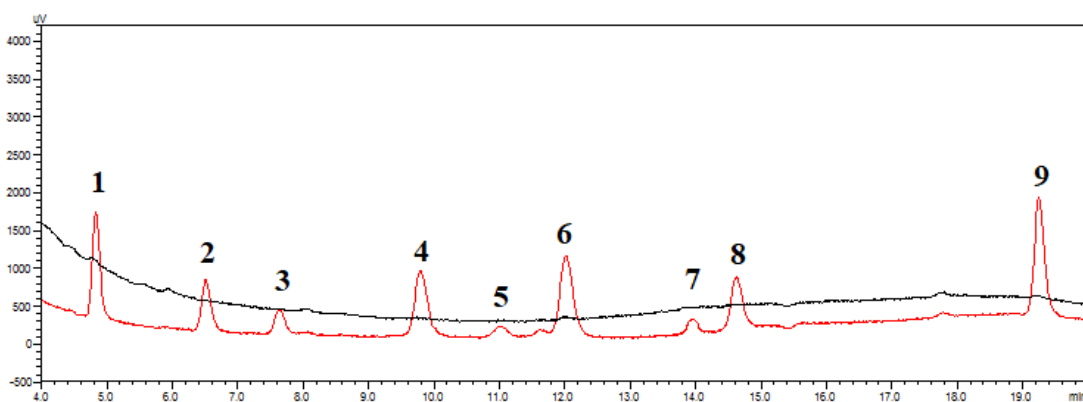

**Figure S14:** Chromatograms obtained at 280 nm for both the blank sample (black, sample 7) and the spiked sample (red, fortified at  $10 \mu\text{g L}^{-1}$ ), both subjected to the optimized extraction method.

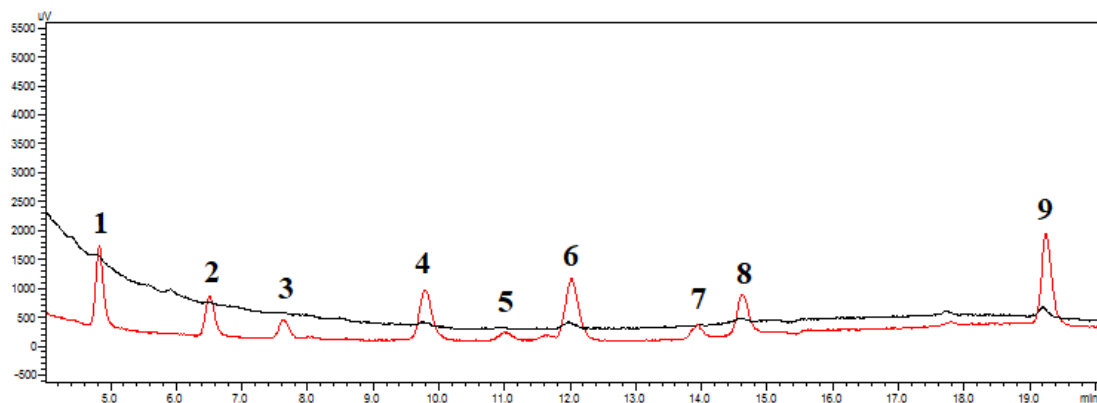

## References

- 1 A. C. da Silva, G. Mafra, D. Spudeit, J. Merib and E. Carasek, *Sep. Sci. Plus*, 2019, **2**, 51–58.
- 2 L. Lahens, J. A. Correa, H. Cabana, Y. Huot and P. A. Segura, *Science of The Total Environment*, 2024, **949**, 175087.
- 3 P. V. M. Muguirrima, N. P. Chirinza, F. León Zerpa and C. A. Mendieta Pino, *Desalination Water Treat.*, 2024, **317**, 100266.
- 4 C. C. Montagner, C. Vidal and R. Acayaba, *Quim. Nova*, DOI:10.21577/0100-4042.20170091.
